# Supplementary material
Source: HighWire-hosted journal article supplement (https://sti.bmj.com/content/94/4/255)

# The prevalence of *Mycoplasma genitalium* in different population groups: systematic review and meta-analysis

Lukas Baumann,<sup>1</sup> Manuel Cina,<sup>1</sup> Dianne Egli-Gany,<sup>1</sup> Myrofora Goutaki,<sup>1</sup> Florian Halbeisen,<sup>1</sup> Gian-Reto Lohrer,<sup>1</sup> Hammad Ali,<sup>2</sup> Pippa Scott,<sup>1,3</sup> Nicola Low<sup>1</sup>

1. Institute of Social and Preventive Medicine, University of Bern, Bern, Switzerland;
2. Kirby Institute, University of New South Wales, Sydney, Australia;
3. Department of Pathology, University of Otago, Christchurch, New Zealand

## Contents

|                                                                                                                                                                        |    |
|------------------------------------------------------------------------------------------------------------------------------------------------------------------------|----|
| Supplementary text, Text S1 and Text S2.....                                                                                                                           | 2  |
| Text S1. Medline search strategy .....                                                                                                                                 | 2  |
| Text S2. Risk of bias assessment .....                                                                                                                                 | 3  |
| Supplementary tables, Table S1 to Table S5 .....                                                                                                                       | 4  |
| Table S1. Included studies, by reference number and study name .....                                                                                                   | 4  |
| Table S2. Characteristics of studies of <i>M. genitalium</i> prevalence in general population and<br>Community based samples .....                                     | 6  |
| Table S3. Meta-regression model of potential sources of heterogeneity in studies of <i>M. genitalium</i><br>prevalence .....                                           | 8  |
| Table S4. Characteristics of studies of <i>M. genitalium</i> prevalence in pregnant women, men who<br>have sex with men and female sex workers, by study setting ..... | 10 |
| Table S5. Characteristics of studies of <i>M. genitalium</i> prevalence in healthcare clinic based settings,<br>by symptom status of patients.....                     | 12 |
| Supplementary figures, Figure S1 to Figure S4 .....                                                                                                                    | 15 |
| Figure S1. Flow chart of included and excluded studies .....                                                                                                           | 15 |
| Figure S2. Risk of bias assessment of included studies .....                                                                                                           | 16 |
| Figure S3. Forest plot of studies of <i>M. genitalium</i> prevalence, by age and sex in general population<br>samples.....                                             | 18 |
| Figure S4. Forest plot of studies of <i>M. genitalium</i> prevalence in healthcare clinic based settings, by<br>symptom status of patients and enrolment process ..... | 19 |

### Supplementary text, Text S1 and Text S2

#### Text S1. Medline search strategy

```
1:      „Mycoplasma genitalium"[Mesh]
2:      Mycoplasma genitalium
3:      1 OR 2
4:      "Mycoplasma Infections"[Mesh]
5:      Mycoplasma
6:      Mycoplasm*
7:      4 OR 5 OR 6
8:      "Reproductive Tract Infections"[Mesh]
9:      genital tract
10:     reproductive tract
11:     "Salpingitis"[Mesh]
12:     Salpingitis
13:     "Endometritis"[Mesh]
14:     Endometritis
15:     "Parametritis"[Mesh]
16:     Parametritis
17:     "Oophoritis"[Mesh]
18:     Oophoritis
19:     Ovary
20:     Metritis
21:     Pelviperitonitis
22:     "Pelvic Inflammatory Disease"[Mesh]
23:     p.i.d.
24:     pelvis
25:     pelvic
26:     Adnexitis
27:     "Sexually Transmitted Diseases"[Mesh]
28:     sexually transmitted
29:     STD
30:     STDs
31:     VD
32:     Sexual disease transmission
33:     Veneral
34:     Venereal
35:     Genital*
36:     Vagina*
37:     Endometri*
38:     Cervix
39:     Cervical*
40:     Urethra*
41:     Fallopian
42:     tuba*
43:     tube
44:     tubes
45:     8 OR 9 OR 10 OR 11 OR 12 OR 13 OR 14 OR 15 OR 16 OR 17 OR 18 OR 19      OR 20 OR 21
OR     22 OR 23 OR 24 OR 25 OR 26 OR 27 OR 28 OR 29 OR 30 OR 31 OR 32 OR 33 OR 34 OR 35 OR
      36 OR 37 OR 38 OR 39 OR 40 OR 41 OR 42 OR 43 OR 44
46:     3 OR (7 AND 45)
Filters: 1981/01/01 – Now      Humans
```

## Supplementary material

### Text S2. Risk of bias and reporting assessment

Target population clearly defined?

- Yes
- No
- Unclear

Source population clearly defined?

- Yes
- No
- Unclear

Source population adequate sample of target population?

- Yes
- No
- Unclear

Similar socio-demographic attributes of responders and non-responders:

- responders compared and similar and non-responders attributes
- responders and non-responders compared and not similar attributes
- responders and non-responders not compared

Was a probability sampling used?

- Yes
- No
- Unclear

Was a sample size calculation reported?

- Adequate
- Inadequate
- Not reported

Was the achieved sample size at least as good as in the sample size calculation?

- Adequate
- Inadequate
- Unclear

Can we be confident in the assessment of exposure?

- Yes
- No

Data provided to calculate prevalence?

- Yes
- No
- Weighted prevalence estimate

Confidence intervals included for prevalence?

- Yes
- No

Data provided on both number of people asked to participate and number of people participating?

- Yes
- No

Response rate:

- over 80%
- 70-80%
- below 70%
- unclear
- not reported

## Supplementary material

### Supplementary tables, Table S1 to Table S5

Table S1. Included studies, by reference number and study name

| Ref no. | Study country, number | First author  | Publication year | Sample             | Population     |
|---------|-----------------------|---------------|------------------|--------------------|----------------|
| 8       | South Korea 1         | Kim SJ        | 2011             | Clinic             | Women and men  |
| 20      | USA 2                 | Manhart LE    | 2007             | General population | Women and men  |
| 21      | Honduras 1            | Paz-Bailey G  | 2009             | General population | Women and men  |
| 22      | Vietnam 1             | Olsen B       | 2009             | General population | Women          |
| 23      | Tanzania 1            | Kapiga SH     | 2006             | General population | Women and men  |
| 24      | Denmark 1             | Andersen B    | 2007             | General population | Women and men  |
| 25      | Great Britain 4       | Sonnenberg P  | 2015             | General population | Women and men  |
| 26      | Great Britain 2       | Oakeshott P   | 2010             | Community based    | Women          |
| 27      | Norway 4              | Jensen AJ     | 2013             | Community based    | Women and men  |
| 28      | Russia 3              | Shipitsyna E  | 2013             | Community based    | Women and men  |
| 29      | Kenya 1               | Mehta SD      | 2012             | Community based    | Men            |
| 30      | Madagascar 1          | Leutscher PDC | 2005             | Community based    | Women and men  |
| 31      | Australia 2           | Bradshaw CS   | 2009             | Community based    | MSM            |
| 32      | El Salvador 1         | Creswell J    | 2012             | Community based    | MSM            |
| 33      | Guatemala 1           | Ham D         | 2015             | Community based    | MSM            |
| 33      | Honduras 3            |               | 2015             | Community based    | MSM            |
| 34      | Nicaragua 1           | Hernandez F   | 2011             | Community based    | MSM            |
| 35      | USA 3                 | Francis SC    | 2008             | Clinic             | MSM            |
| 36      | Norway 5              | Reinton N     | 2013             | Clinic             | MSM            |
| 37      | China 2               | Xiang Z       | 2012             | Community based    | Female CSW     |
| 38      | Germany 1             | Jansen K      | 2015             | Community based    | Female CSW     |
| 39      | Honduras 2            | Johnston LG   | 2012             | Community based    | Female CSW     |
| 40      | Uganda 1              | Vandepitte J  | 2012             | Community based    | Female CSW     |
| 41      | Benin, Ghana 1        | Pepin J       | 2005             | Clinic             | Female CSW     |
| 42      | Great Britain 1       | Oakeshott P   | 2004             | Clinic             | Pregnant women |
| 43      | Japan 1               | Kataoka S     | 2006             | Clinic             | Pregnant women |
| 44      | USA 5                 | Agger WA      | 2014             | Clinic             | Pregnant women |
| 45      | France 2              | Peuchant O    | 2015             | Clinic             | Pregnant women |
| 46      | Australia 1           | McKechnie ML  | 2009             | Clinic             | Women and men  |
| 47      | Australia 3           | Walker J      | 2011             | Clinic             | Women          |
| 48      | Australia 4           | Lusk MJ       | 2011             | Clinic             | Women          |
| 49      | China 1               | Bao T         | 2010             | Clinic             | Men            |

## Supplementary material

|    |                  |                  |      |        |                            |
|----|------------------|------------------|------|--------|----------------------------|
| 50 | France 1         | Sednaoui P       | 2011 | Clinic | Women and men              |
| 51 | France 3         | Clarivet B       | 2014 | Clinic | Women and men              |
| 52 | Great Britain 3  | Jalal H          | 2013 | Clinic | Women and men              |
| 53 | Great Britain 5  | Svenstrup HF     | 2014 | Clinic | Women                      |
| 54 | Great Britain 7  | Slack R          | 2014 | Clinic | Men                        |
| 55 | Netherlands 1    | Van der Veer C   | 2015 | Clinic | Heterosexual men           |
| 55 | Netherlands 2    |                  | 2015 | Clinic | MSM                        |
| 56 | Germany 2        | Lallemant A      | 2015 | Clinic | Heterosexual women and men |
| 56 | Germany 3        |                  |      | Clinic | MSM                        |
| 57 | Norway 1         | Moi H            | 2009 | Clinic | Men                        |
| 58 | Norway 2         | Moi H            | 2009 | Clinic | Women                      |
| 59 | Norway 3         | Nilsen E         | 2011 | Clinic | Women and men              |
| 60 | Norway 6         | Hartgill U       | 2015 | Clinic | Women                      |
| 61 | Norway 7         | Reinton N        | 2015 | Clinic | Women and men              |
| 62 | Russia 1         | Khryanin A       | 2011 | Clinic | Women and men              |
| 63 | Russia 2         | Berle LM         | 2012 | Clinic | Women and men              |
| 64 | South Africa 1   | Hay B            | 2015 | Clinic | Women                      |
| 65 | South Korea 2    | Choi JY          | 2013 | Clinic | Men                        |
| 66 | South Korea 3    | Kim Y            | 2014 | Clinic | Women                      |
| 67 | Sweden 1         | Falk L           | 2003 | Clinic | Women and men              |
| 68 | Sweden 2         | Falk L           | 2004 | Clinic | Men                        |
| 69 | Sweden 3         | Jensen JS        | 2004 | Clinic | Women and men              |
| 70 | Sweden 4         | Mellenius H      | 2005 | Clinic | Women and men              |
| 71 | Sweden 5         | Anagrus C        | 2005 | Clinic | Women and men              |
| 72 | Sweden 6         | Jurstrand M      | 2005 | Clinic | Women and men              |
| 73 | Sweden 7         | Hogdahl M        | 2007 | Clinic | Women and men              |
| 74 | Sweden 8         | Edberg A         | 2008 | Clinic | Women and men              |
| 75 | Sweden 9         | Bjartling C      | 2012 | Clinic | Women                      |
| 76 | Uganda 2         | Tobian AA        | 2014 | Clinic | Women                      |
| 77 | USA 1            | Manhart LE       | 2003 | Clinic | Women                      |
| 78 | USA 4            | Hancock EB       | 2010 | Clinic | Women                      |
| 79 | Venezuela 1 2013 | Peralta-Arias RD | 2013 | Clinic | Women                      |
| 80 | Canada 1         | Gesink D         | 2016 | Clinic | Women, men, transgender    |
| 81 | Great Britain 6  | Leung A          | 2006 | Clinic | Men                        |

Abbreviations: CSW, commercial sex worker; MSM, men who have sex with men

## Supplementary material

Table S2. Characteristics of studies of *M. genitalium* prevalence in general population and Community based samples

| Country, number                            | Year                      | First author | Study type      | Specimen type         | Study setting and population                                                                                                                                               | Sample size | Gender | Age, years range/median/mean |
|--------------------------------------------|---------------------------|--------------|-----------------|-----------------------|----------------------------------------------------------------------------------------------------------------------------------------------------------------------------|-------------|--------|------------------------------|
| <b>Very high or high development index</b> | <b>General Population</b> |              |                 |                       |                                                                                                                                                                            |             |        |                              |
| Denmark 1                                  | 2007                      | Andersen B   | Cross-sectional | M: Urine<br>W: Vagina | Random sample of men and women who participated in a population- based screening programme on Chlamydia                                                                    | 1652        | M&W    | 21-23/NR/NR                  |
| Great Britain 4                            | 2015                      | Sonnenberg P | Cross-sectional | Urine                 | A stratified, clustered sample of sexually experienced people living in the UK aged 16 - 44, with postcode sectors as the primary sampling units                           | 4507        | M&W    | 16-44/NR/NR                  |
| USA 2                                      | 2007                      | Manhart LE   | Cross-sectional | Urine                 | Randomly sampled in house respondents of the Wave III of the national Add Health study, recruited from high schools and junior high schools                                | 2932        | M&W    | 18-27/NR/NR                  |
| <b>Middle or low development index</b>     | <b>General population</b> |              |                 |                       |                                                                                                                                                                            |             |        |                              |
| Honduras 1                                 | 2009                      | Paz-Bailey G | Cross-sectional | M: Urine<br>W: Vagina | Multistage cluster sampling from the eight largest Garifuna (ethnic minority) communities in the three departments with the highest concentration of Garifunas in Honduras | 791         | M&W    | >18/30/NR                    |
| Tanzania 1                                 | 2006                      | Kapiga SH    | Cross-sectional | Urine                 | Stratified random sample of women aged 20-44 years and their husbands/male regular partners selected from different clusters within Moshi urban district, Tanzania         | 2028        | M&W    | 20-44/NR/NR                  |
| Vietnam 1                                  | 2009                      | Olsen B      | Cross-sectional | Cervix                | Stratified random sample of married women in a rural geographical surveillance site in Vietnam                                                                             | 990         | W      | 18-49/NR/NR                  |
| <b>Very high or high development index</b> | <b>Community setting</b>  |              |                 |                       |                                                                                                                                                                            |             |        |                              |
| Great Britain 2                            | 2010                      | Oakeshott P  | Baseline cohort | Vagina                | Convenient sample of female students from 20 London universities and colleges                                                                                              | 2378        | W      | NR/NR/20                     |
| Norway 4                                   | 2013                      | Jensen AJ    | Cross-sectional | Urine                 | Students recruited from three colleges in three northernmost counties in Norway                                                                                            | 655         | M&W    | NR/NR/NR                     |

## Supplementary material

| Country, number                        | Year                     | First author  | Study type      | Specimen type         | Study setting and population                                                                                                                                                                                               | Sample size | Gender | Age, years range/median/mean |
|----------------------------------------|--------------------------|---------------|-----------------|-----------------------|----------------------------------------------------------------------------------------------------------------------------------------------------------------------------------------------------------------------------|-------------|--------|------------------------------|
| Russia 3                               | 2013                     | Shipitsyna E  | Cross-sectional | M: Urine<br>W: Vagina | Consecutive sample of sexually active attendees of a youth centre in St. Petersburg, Russia                                                                                                                                | 1207        | M&W    | 15-25/NR/20                  |
| <b>Middle or low development index</b> | <b>Community setting</b> |               |                 |                       |                                                                                                                                                                                                                            |             |        |                              |
| Kenya 1                                | 2012                     | Mehta SD      | Cross-sectional | Urine                 | Sample of young men drawn from a RCT on male circumcision, recruited via local newspapers, radio, fliers, and street shows by drama and musical groups. Enrolled participants recruited further participants for screening | 526         | M      | 23-31/NR/NR                  |
| Madagascar 1                           | 2005                     | Leutscher PDC | Baseline RCT    | Urine                 | Sample of adults aged 15-49 years in rural villages (Ambodikatakata, Ambodimanga, Ankatoko, and Tanambao) on Madagascar's northwest coast                                                                                  | 643         | M&W    | NR/29/NR                     |

Abbreviations: M, men; NR, not reported; W, women

## Supplementary material

Table S3. Meta-regression model of potential sources of heterogeneity in studies of *M. genitalium* prevalence

| Population based studies                                              |                         |             |            |         |                         |                                |                      |           |                |
|-----------------------------------------------------------------------|-------------------------|-------------|------------|---------|-------------------------|--------------------------------|----------------------|-----------|----------------|
| Meta-Regression                                                       |                         |             |            |         |                         | Meta-analysis (random effects) |                      |           |                |
| Variable                                                              | Category-description    | Coefficient | 95% CI     | p-value | Residual I <sup>2</sup> | Number of studies              | Summary estimate, %  | 95% CI    | I <sup>2</sup> |
| Human development index                                               | Medium + low            | 3.1         | -0.1, 6.3  | 0.057   | 92.65%                  | 5                              | 4.8                  | 2.3, 7.3  | 95.6%          |
|                                                                       | cons (Very high + high) | 1.6         | -0.5, 3.7  | 0.125   |                         | 6                              | 1.5                  | 0.9, 2.2  | 83.9%          |
| Was a probability sample used?                                        | Yes                     | -1.1        | -5.0, 2.9  | 0.549   | 92.73%                  | 6                              | 2.1                  | 1.2, 3.0  | 91.5%          |
|                                                                       | cons (No + unclear)     | 3.6         | 0.6, 6.5   | 0.023   |                         | 5                              | 3.4                  | 1.6, 5.2  | 93.8%          |
| Did they report the result with CIs?                                  | Yes                     | 1.5         | -2.8, 5.9  | 0.454   | 93.16%                  | 8                              | 3.0                  | 1.9, 4.0  | 94.2%          |
|                                                                       | cons (No)               | 1.9         | -1.8, 5.6  | 0.283   |                         | 3                              | 1.7                  | 0.5, 2.9  | 79.8%          |
| Is the source population an adequate sample of the target population? | Yes                     | -2.5        | -6.6, 1.6  | 0.637   | 91.61%                  | 8                              | 1.9                  | 1.2, 2.7  | 89.1%          |
|                                                                       | cons (No + unclear)     | 4.8         | 1.3, 8.3   | 0.013   |                         | 3                              | 4.8                  | 2.0, 7.5  | 95.4%          |
| Response rate ≥80                                                     | Response rate ≥80       | 4.5         | -2.1, 11.2 | 0.157   | 93.22%                  | 1                              | 7.1                  | 4.7, 9.5  | N/A            |
|                                                                       | cons (< 80 or unclear)  | 2.6         | 0.7, 4.4   | 0.011   |                         | 10                             | 2.3                  | 1.5, 3.1  | 92.0%          |
| Sample size ≥1000                                                     | Sample size ≥1000       | -2.1        | -5.8, 1.6  | 0.229   | 93.21%                  | 6                              | 2.0                  | 1.2, 2.8  | 90.8%          |
|                                                                       | cons (<1000)            | 6.3         | 0.2, 12.4  | 0.045   |                         | 5                              | 4.1                  | 1.8, 6.5  | 94.9%          |
| Sex                                                                   | Men                     | 0.9         | -1.6, 3.3  | 0.470   | 88.81%                  | 9                              | 3.0                  | 1.7, 4.2  | 88.8%          |
|                                                                       | cons (Women)            | 2.2         | 0.6, 3.9   | 0.012   |                         | 10                             | 2.0                  | 1.2, 2.7  | 88.8%          |
| Clinic based studies                                                  |                         |             |            |         |                         |                                |                      |           |                |
| Meta-Regression                                                       |                         |             |            |         |                         | Meta-analysis (random effects) |                      |           |                |
| Variable                                                              | Category-description    | Coefficient | 95% CI     | p-value | Residual I <sup>2</sup> | Number of studies              | Pooled prevalence, % | 95% CI    | I <sup>2</sup> |
| Human development index                                               | Medium + low            | 1.8         | -2.5, 6.1  | 0.398   | 98.02%                  | 2                              | 6.0                  | 0.8, 11.2 | 93.9%          |
|                                                                       | cons (Very high + high) | 4.1         | 3.1, 5.1   | 0.000   |                         | 32                             | 4.1                  | 3.3, 4.8  | 98.0%          |
| Was a probability sample used?                                        | Yes                     | 2.9         | -2.9, 8.6  | 0.315   | 97.89%                  | 1                              | 7.0                  | 5.2, 9.1  | N/A            |
|                                                                       | cons (No + unclear)     | 4.1         | 3.2, 5.0   | 0.000   |                         | 36                             | 4.1                  | 3.4, 4.8  | 97.9%          |



## Supplementary material

|                                                                       |                        |      |           |       |        |    |     |          |       |
|-----------------------------------------------------------------------|------------------------|------|-----------|-------|--------|----|-----|----------|-------|
| Did they report the result with CIs?                                  | Yes                    | -0.7 | -3.0, 1.6 | 0.555 | 97.82% | 7  | 3.5 | 2.2, 4.9 | 95.5% |
|                                                                       | cons (No)              | 4.3  | 3.3, 5.3  | 0.000 |        | 30 | 4.3 | 3.5, 5.2 | 98.0% |
| Is the source population an adequate sample of the target population? | Yes                    | 0.6  | -1.4, 2.7 | 0.523 | 97.85% | 10 | 4.7 | 2.4, 7.0 | 99.0% |
|                                                                       | cons (No + unclear)    | 4.0  | 3.0, 5.1  | 0.000 |        | 27 | 3.9 | 3.3, 4.6 | 96.1% |
| Response rate ≥80                                                     | Response rate ≥80      | -0.4 | -3.1, 2.2 | 0.501 | 97.75% | 5  | 3.7 | 2.0, 5.4 | 96.1% |
|                                                                       | cons (< 80 or unclear) | 4.3  | 3.3, 5.2  | 0.376 |        | 32 | 4.2 | 3.4, 5.0 | 97.9% |
| Sample size ≥1000                                                     | Sample size ≥1000      | -0.1 | -1.9, 1.7 | 0.893 | 97.90% | 17 | 4.1 | 3.1, 5.2 | 98.8% |
|                                                                       | cons (<1000)           | 4.4  | 1.5, 7.2  | 0.004 |        | 20 | 4.2 | 3.2, 5.3 | 93.2% |
| Sex                                                                   | Men                    | 0.0  | -1.3, 1.3 | 0.977 | 93.78% | 23 | 3.9 | 3.2, 4.6 | 91.6% |
|                                                                       | cons (Women)           | 4.0  | 3.1, 4.9  | 0.000 |        | 27 | 3.8 | 3.2, 4.5 | 94.9% |

Abbreviations: CI, confidence intervals; cons, constant

Note: cons is the reference group, with the columns 'Coefficient' and '95% CI' showing the average summary estimate of prevalence and 95% CI. The value for the other (non-reference) category is the difference in average prevalence between the groups; N/A, no  $I^2$  available for these variables because only one study was included in group

## Supplementary material

Table S4. Characteristics of studies of *M. genitalium* prevalence in pregnant women, men who have sex with men and female sex workers, by study setting

| Country, number             | Year | First author   | Study type      | Specimen type         | Study setting and population                                                         | Sample size | Gender | Age, years range/median/mean |
|-----------------------------|------|----------------|-----------------|-----------------------|--------------------------------------------------------------------------------------|-------------|--------|------------------------------|
| <b>MSM, community based</b> |      |                |                 |                       |                                                                                      |             |        |                              |
| Australia 2                 | 2009 | Bradshaw CS    | Cross-sectional | Urine, rectum, throat | MSM attending six "sex on premises venues" in Melbourne                              | 510         | Men    | 18-85/39/NR                  |
| El Salvador 1               | 2012 | Creswell J     | Cross-sectional | Urine                 | MSM in San Salvador and San Miguel                                                   | 647         | Men    | NR/NR/NR                     |
| Guatemala 1                 | 2015 | Ham D          | Cross-sectional | Urine                 | MSM in Guatemala                                                                     | 524         | Men    | NR/NR/NR                     |
| Honduras 3                  | 2015 | Ham D          | Cross-sectional | Urine                 | MSM in Honduras                                                                      | 688         | Men    | NR/NR/NR                     |
| Nicaragua 1                 | 2011 | Hernandez F    | Cross-sectional | Urine                 | MSM in Nicaragua                                                                     | 643         | Men    | >18/NR/NR                    |
| <b>MSM, clinic based</b>    |      |                |                 |                       |                                                                                      |             |        |                              |
| Germany 3                   | 2015 | Lallemant A    | Cross-sectional | Urine                 | MSM seeking HIV testing at local public health authorities in North Rhein-Westphalia | 549         | Men    | NR/NR/NR                     |
| Netherlands 2               | 2015 | Van der Veer C | Cross-sectional | Urine                 | MSM attending a sexual health clinic in Amsterdam                                    | 678         | Men    | NR/NR/41                     |
| Norway 5                    | 2013 | Reinton N      | Cross-sectional | Urine, rectum         | MSM attending two sexual health clinics in Oslo                                      | 1778        | Men    | 18-82/35/NR                  |
| USA 3                       | 2008 | Francis SC     | Cross-sectional | Rectum                | MSM attending a sexual health clinic in San Francisco                                | 500         | Men    | NR/NR/NR                     |
| <b>FSW, community based</b> |      |                |                 |                       |                                                                                      |             |        |                              |
| China 2                     | 2012 | Xiang Z        | Cross-sectional | Cervix                | FSW from various sex-work venues                                                     | 810         | Women  | 18-52/NR/27                  |
| Germany 1                   | 2015 | Jansen K       | Cross-sectional | Vagina                | FSW from 292 different places of work                                                | 1445        | Women  | NR/NR/NR                     |
| Honduras 2                  | 2012 | Johnston LG    | Cross-sectional | Vagina                | FSW in four Honduran cities                                                          | 726         | Women  | NR/NR/NR                     |
| Uganda 1                    | 2012 | Vandepitte J   | Baseline cohort | Cervix                | FSW from red-light areas in southern Kampala                                         | 1025        | Women  | NR/26/26                     |
| <b>FSW, clinic based</b>    |      |                |                 |                       |                                                                                      |             |        |                              |
| Benin, Ghana 1              | 2005 | Pepin J        | Cross-sectional | Cervix                | FSW from sexual health clinics in Acca (Ghana), Cotonou and Port Novo (Benin)        | 826         | Women  | NR/NR/NR                     |

## Supplementary material

| <b>Pregnant women, antenatal clinics</b> |      |             |                 |        |                                                                                              |      |       |             |
|------------------------------------------|------|-------------|-----------------|--------|----------------------------------------------------------------------------------------------|------|-------|-------------|
| France 2                                 | 2015 | Peuchant O  | Cross-sectional | Vagina | Pregnant women attending the Bordeaux University Hospital                                    | 1004 | Women | 18-44/30/NR |
| Great Britain 1                          | 2004 | Oakeshott P | Cross-sectional | Urine  | Pregnant women (<10 weeks gestation) from 32 general practices and 5 family planning clinics | 915  | Women | 16-48/NR/31 |
| Japan 1                                  | 2006 | Kataoka S   | Baseline cohort | Vagina | Pregnant women with singleton pregnancies attending a university hospital                    | 877  | Women | NR/NR/29    |
| USA 5                                    | 2014 | Agger WA    | Baseline cohort | Urine  | Pregnant women attending 4 sites for initial antenatal visits in Milwaukee                   | 676  | Women | 18-44/NR/NR |

Abbreviations: FSW, female sex workers; MSM, men who have sex with men; NR, not reported

## Supplementary material

Table S5. Characteristics of studies of *M. genitalium* prevalence in healthcare clinic based settings, by symptom status of patients

| Country, number                                        | Year | First author | Study type      | Specimen type                                  | Study setting and population                                                                     | Sample size | Gender  | Age, years range/median/mean | Number of symptomatic patients               |
|--------------------------------------------------------|------|--------------|-----------------|------------------------------------------------|--------------------------------------------------------------------------------------------------|-------------|---------|------------------------------|----------------------------------------------|
| <b>Asymptomatic only</b>                               |      |              |                 |                                                |                                                                                                  |             |         |                              |                                              |
| France 3                                               | 2014 | Clarivet B   | Cross-sectional | Urine                                          | Asymptomatic patients attending anonymous STI clinics                                            | 1381        | W&M     | <30/22/NR                    | 0/1381 (0%)                                  |
| South Korea 1                                          | 2011 | Kim SJ       | Cross-sectional | M: Urine<br>W: Cervix                          | Sexually active asymptomatic patients attending hospital for general check-up                    | 709         | W&M     | 20-60/NR/45                  | 0/709 (0%)                                   |
| South Korea 3                                          | 2014 | Kim Y        | Cross-sectional | Cervix                                         | Healthy Korean women visiting a hospital for general medical check-up                            | 799         | W       | 25-81/49/50                  | 0/799 (0%)                                   |
| <b>Consecutive patients, with and without symptoms</b> |      |              |                 |                                                |                                                                                                  |             |         |                              |                                              |
| Australia 3                                            | 2011 | Walker J     | Baseline cohort | Vagina                                         | Consecutive patients attending primary health care clinics in Australia                          | 1116        | W       | 16-25/21/NR                  | 249/1116 (22%)                               |
| Australia 4                                            | 2011 | Lusk MJ      | Cross-sectional | Cervix                                         | Consecutive patients from two STI clinics in Sydney                                              | 527         | W       | NR/NR/NR                     | NR                                           |
| Canada 1                                               | 2016 | Gesink D     | Baseline cohort | Urine                                          | Consecutive STI clinic attendees in Toronto, Ontario                                             | 1193        | W&M & T | 19-57/NR/33                  | M: T 442/884 (50%)<br>W: 124/309 (40%)<br>NR |
| Great Britain 3                                        | 2013 | Jalal H      | Cross-sectional | W: Cervix and urethra<br>M: Urethra            | Consecutive patients attending a GUM clinic in Cambridge                                         | 1718        | W&M     | 12-87/W24,M27/NR             | NR                                           |
| Norway 6                                               | 2015 | Hartgill U   | Cross-sectional | Cervix                                         | Consecutive patients attending an STI clinic for an STI screen                                   | 1097        | W       | NR/NR/NR                     | NR                                           |
| Norway 7                                               | 2015 | Reinton N    | Cross-sectional | Unclear                                        | Consecutive samples for CT screening from 3 STI clinics and 613 primary care clinics around Oslo | 78505       | W&M     | 13-79/NR/NR                  | NR                                           |
| South Africa 1                                         | 2015 | Hay B        | Cross-sectional | Vagina, rectum, pharynx if oral sex            | Consecutive female attendees of 25 selected Primary Health Care facilities                       | 601         | W       | 18-49/30/ NR                 | NR                                           |
| Sweden 2                                               | 2004 | Falk L       | Cross-sectional | Urine                                          | Consecutive patients attending Örebro University Hospital STI clinic                             | 512         | M       | 16-67/27/ NR                 | 23/512 (45%)                                 |
| Sweden 3                                               | 2004 | Jensen JS    | Cross-sectional | M: Urethra, urine<br>W: Cervix, urethra, urine | Consecutive patients attending the outpatient STI clinic at Huddinge University Hospital         | 2605        | W&M     | NR/NR/NR                     | NR                                           |
| Sweden 5                                               | 2005 | Anagrius C   | Cross-sectional | M: Urethra W: Urethra, cervix                  | Consecutive patients attending an STI clinic                                                     | 946         | W&M     | 14-67/NR/NR                  | W: 130/446 (29%)<br>M: 125/501 (25%)         |
| Sweden 6                                               | 2005 | Jurstrand M  | Cross-sectional | M: Urine<br>W: Cervix                          | Consecutive attendees to the outpatient STI clinic at Örebro Hospital Sweden                     | 699         | W&M     | 15-58/W23,M27/W26,M28        | NR                                           |
| Sweden 7                                               | 2007 | Hogdahl M    | Cross-sectional | Urine                                          | Consecutive patients attending STI clinics                                                       | 833         | W&M     | 17-52/NR/W22,M26             | W: 112/405 (28%)<br>M: 89/391 (23%)          |

## Supplementary material

| Country, number                                | Year | First author   | Study type      | Specimen type                                        | Study setting and population                                                                         | Sample size | Gender | Age, years range/median/mean | Number of symptomatic patients |
|------------------------------------------------|------|----------------|-----------------|------------------------------------------------------|------------------------------------------------------------------------------------------------------|-------------|--------|------------------------------|--------------------------------|
| Sweden 8                                       | 2008 | Edberg A       | Cross-sectional | M: Urine &/or urethra. W: Cervix &/or urine          | Consecutive patients attending an STI clinic at the Central Hospital Karlstad, Sweden                | 679         | W&M    | 17-82/W25,M27/NR             | NR                             |
| Sweden 9                                       | 2012 | Bjartling C    | Cross-sectional | 2003-2004: Urine & cervix, 2005-2008: Urine & vagina | Consecutive patients at emergency gynecological outpatient service, Skane University Hospital, Malmö | 5519        | W      | 15-46/NR/NR                  | NR                             |
| <b>Patient enrolment not clearly described</b> |      |                |                 |                                                      |                                                                                                      |             |        |                              |                                |
| Australia 1                                    | 2009 | McKechnie ML   | Cross-sectional | Urine                                                | Men with and without urethral symptoms attending two sexual health clinics in Sydney                 | 529         | M      | 19-76/35/37                  | 277/529 (52%)                  |
| China 1                                        | 2010 | Bao T          | Cross-sectional | Urine                                                | GUM clinic attendees in Tangdu                                                                       | 757         | M      | NR/NR/NR                     | NR                             |
| France 1                                       | 2011 | Sednaoui P     | Cross-sectional | Unclear                                              | Patients attending a clinic in Paris for STI screening, a medical consultation/check-up              | 955         | W&M    | NR/NR/NR                     | NR                             |
| Germany 2                                      | 2015 | Lallemant A    | Cross-sectional | M: Urine<br>W: Vagina                                | Patients seeking HIV testing in North Rhine-Westphalia                                               | 3187        | W&M    | NR/30/NR                     | NR                             |
| Great Britain 5                                | 2014 | Svenstrup HF   | Cross-sectional | Cervix, vagina, urine                                | Women screened for CT in National Chlamydia Screening Programme and two STI clinics                  | 4613        | W      | 15-64/NR/NR                  | NR                             |
| Great Britain 6                                | 2006 | Leung A        | Cross-sectional | Urethra, urine                                       | Men attending GUM clinics in Bristol, Truro, Bath, UK                                                | 680         | M      | NR/NR/NR                     | 328/680 (48%)                  |
| Great Britain 7                                | 2014 | Slack R        | Cross-sectional | Urine                                                | GUM clinic attendees in two clinics                                                                  | 563         | M      | NR/NR/NR                     | 159/563 (28%)                  |
| Netherlands 1                                  | 2015 | Van der Veer C | Cross-sectional | Urine                                                | Men attending an STI clinic in Amsterdam                                                             | 526         | M      | NR/37/NR                     | 266/1204 (22%)                 |
| Norway 1                                       | 2009 | Moi H          | Cross-sectional | Urine                                                | STI clinic attendees with symptoms, multiple partners, MSM, contacts of STI in Oslo                  | 8468        | M      | NR/NR/31                     | 3024/8468 (36%)                |
| Norway 2                                       | 2009 | Moi H          | Cross-sectional | Urine, cervix                                        | STI clinic attendees with symptoms, multiple partners, contacts of STI in Oslo                       | 7646        | W      | NR/NR/26                     | NR (60-64%)                    |
| Norway 3                                       | 2011 | Nilsen E       | Cross-sectional | Urine, urethra or cervix                             | All samples sent to the Molde Hospital Laboratory, Norway, for CT testing                            | 950         | W&M    | NR/NR/W26,M29                | NR                             |
| Russia 1                                       | 2011 | Khryanin A     | Cross-sectional | Urethra and/or cervix                                | Patients attending antenatal clinics, hospitals, medical centers, STI clinics                        | 9208        | W&M    | NR/NR/NR                     | NR                             |
| Russia 2                                       | 2012 | Berle LM       | Cross-sectional | Urine                                                | HIV centre, STI clinic, military, students, abortion clinic                                          | 1729        | W&M    | NR/NR/NR                     | NR                             |

## Supplementary material

| Country, number | Year | First author     | Study type      | Specimen type                | Study setting and population                                                                                    | Sample size | Gender | Age, years range/median/mean | Number of symptomatic patients |
|-----------------|------|------------------|-----------------|------------------------------|-----------------------------------------------------------------------------------------------------------------|-------------|--------|------------------------------|--------------------------------|
| South Korea 2   | 2013 | Choi JY          | Cross-sectional | Urine                        | Healthy asymptomatic policemen participating in a general prostate health checkup program in Seoul, South Korea | 551         | M      | NR/NR/51                     | 95/551 (17%)                   |
| Sweden 1        | 2003 | Falk L           | Cross-sectional | M: Urine<br>W: Urine, cervix | STI clinic attendees                                                                                            | 980         | W&M    | NR/NR/NR                     | NR                             |
| Sweden 4        | 2005 | Mellenius H      | Cross-sectional | Urine                        | Patients tested for CT at a dermatology and STI clinic, Norrland University                                     | 823         | W&M    | NR/NR/NR                     | NR                             |
| Uganda 2        | 2014 | Tobian AR        | ?               | Vagina                       | Female partners of men in an RCT of circumcision for HIV prevention                                             | 831         | W      | NR/NR/NR                     | 305/823 (37%)                  |
| USA 1           | 2003 | Manhart LE       | Cross-sectional | Cervix                       | Archived samples from a previous study of randomly selected STI clinic attendees                                | 719         | W      | 16-45/NR/NR                  | 139/539 (26%)                  |
| USA 4           | 2010 | Hancock EB       | Cross-sectional | Vagina                       | Women attending an STI clinic in Seattle                                                                        | 1090        | W      | 16-45/24/NR                  | NR                             |
| Venezuela 1     | 2013 | Peralta-Arias RD | Cross-sectional | Cervix                       | First time attendees in a fertility clinic                                                                      | 3358        | W      | NR/NR/35                     | NR                             |

Abbreviations: CT, Chlamydia trachomatis ; GUM, genitourinary medicine; M, men; MSM, men who have sex with men NR, not reported; STI, sexually transmitted infection; T, transgender; W, women

# Supplementary figures, Figure S1 to Figure S4

Figure S1. Flow chart of included and excluded studies

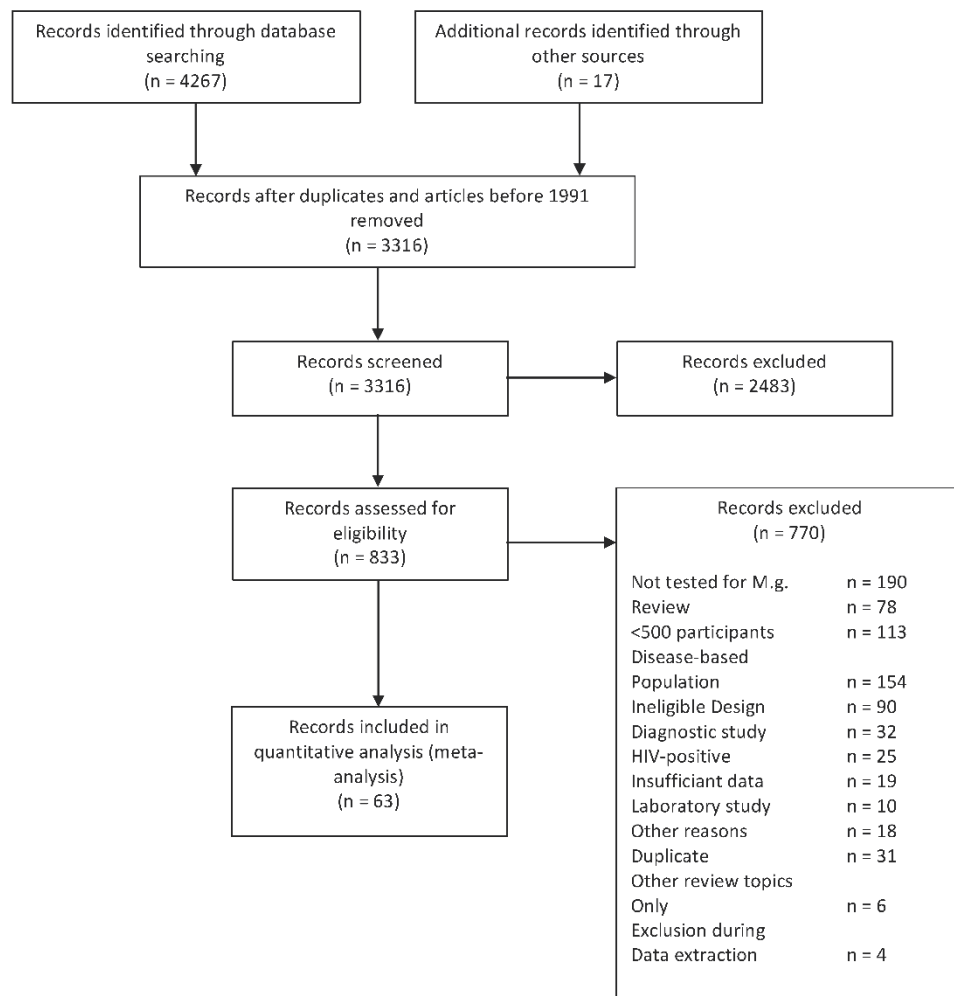

Figure S2. Risk of bias assessment of included studies

| Study identifier              | Target population clearly defined? | Source population clearly defined? | Source population adequate sample of target population? | Similar responders and non-responders? | Probability sample used? | Sample size calculation reported? | Calculated sample size achieved? | Can we be confident in the assessment of | Data provided to calculate prevalence? | Confidence intervals reported? | Data provided on number of people asked to participate | Response rate |
|-------------------------------|------------------------------------|------------------------------------|---------------------------------------------------------|----------------------------------------|--------------------------|-----------------------------------|----------------------------------|------------------------------------------|----------------------------------------|--------------------------------|--------------------------------------------------------|---------------|
| Australia 1, 2009             |                                    |                                    | ?                                                       |                                        |                          | ?                                 | ?                                |                                          |                                        |                                |                                                        | ?             |
| Australia 2, 2009             |                                    |                                    |                                                         |                                        |                          | ?                                 | ?                                |                                          |                                        |                                |                                                        |               |
| Australia 3, 2011             |                                    |                                    |                                                         |                                        |                          |                                   |                                  |                                          |                                        |                                |                                                        |               |
| Australia 4, 2011             |                                    |                                    |                                                         |                                        |                          | ?                                 | ?                                |                                          |                                        |                                |                                                        |               |
| Benin, Ghana 1, 2005          |                                    |                                    |                                                         |                                        | ?                        | ?                                 | ?                                |                                          |                                        |                                |                                                        | ?             |
| Canada 1, 2016                |                                    |                                    |                                                         |                                        |                          | ?                                 | ?                                |                                          |                                        |                                |                                                        | ?             |
| China 1, 2010                 |                                    |                                    | ?                                                       |                                        |                          | ?                                 | ?                                |                                          |                                        |                                |                                                        | ?             |
| China 2, 2012                 |                                    |                                    |                                                         |                                        |                          | ?                                 | ?                                |                                          |                                        |                                |                                                        | ?             |
| Denmark 1, 2007               |                                    |                                    | ?                                                       |                                        |                          | ?                                 | ?                                |                                          |                                        |                                |                                                        |               |
| El Salvador 1, 2012           |                                    |                                    | ?                                                       |                                        |                          |                                   |                                  |                                          |                                        |                                |                                                        | ?             |
| France 1, 2011                |                                    |                                    |                                                         |                                        |                          | ?                                 | ?                                |                                          |                                        |                                |                                                        | ?             |
| France 2, 2015                |                                    |                                    |                                                         |                                        |                          |                                   | ?                                |                                          |                                        |                                |                                                        |               |
| France 3, 2014                |                                    |                                    |                                                         |                                        |                          | ?                                 | ?                                |                                          |                                        |                                |                                                        |               |
| Germany 1, 2015               |                                    |                                    |                                                         |                                        | ?                        | ?                                 | ?                                |                                          |                                        |                                |                                                        | ?             |
| Germany 2,3, 2015             |                                    |                                    |                                                         |                                        |                          | ?                                 | ?                                |                                          |                                        |                                |                                                        | ?             |
| Great Britain 1, 2004         |                                    |                                    | ?                                                       |                                        |                          | ?                                 | ?                                |                                          |                                        |                                |                                                        |               |
| Great Britain 2, 2010         |                                    |                                    |                                                         |                                        |                          | ?                                 | ?                                |                                          |                                        |                                |                                                        | ?             |
| Great Britain 3, 2013         |                                    |                                    |                                                         |                                        |                          | ?                                 | ?                                |                                          |                                        |                                |                                                        | ?             |
| Great Britain 4, 2015         |                                    |                                    |                                                         |                                        |                          |                                   |                                  |                                          |                                        |                                |                                                        |               |
| Great Britain 5, 2014         |                                    |                                    |                                                         |                                        |                          | ?                                 | ?                                |                                          |                                        |                                |                                                        | ?             |
| Great Britain 6, 2006         |                                    |                                    | ?                                                       |                                        |                          | ?                                 | ?                                |                                          |                                        |                                |                                                        | ?             |
| Great Britain 7, 2014         |                                    |                                    |                                                         |                                        |                          | ?                                 | ?                                |                                          |                                        |                                |                                                        | ?             |
| Guatemala 1, Honduras 3, 2015 |                                    |                                    |                                                         |                                        |                          | ?                                 | ?                                |                                          |                                        |                                |                                                        | ?             |
| Honduras 1, 2009              |                                    |                                    |                                                         |                                        |                          |                                   |                                  |                                          |                                        |                                |                                                        |               |
| Honduras 2, 2012              |                                    |                                    | ?                                                       |                                        |                          |                                   |                                  |                                          |                                        |                                |                                                        | ?             |
| Japan 1, 2006                 |                                    |                                    | ?                                                       |                                        |                          | ?                                 | ?                                |                                          |                                        |                                |                                                        | ?             |
| Kenya 1, 2012                 |                                    |                                    | ?                                                       |                                        | ?                        | ?                                 | ?                                |                                          |                                        |                                |                                                        | ?             |
| Madagascar 1, 2005            |                                    |                                    |                                                         |                                        | ?                        | ?                                 | ?                                |                                          |                                        |                                |                                                        | ?             |
| Netherlands 1,2, 2015         |                                    |                                    |                                                         |                                        |                          | ?                                 | ?                                |                                          |                                        |                                |                                                        | ?             |
| Nicaragua 1, 2011             |                                    |                                    |                                                         |                                        |                          | ?                                 | ?                                |                                          |                                        |                                |                                                        | ?             |
| Norway 1, 2009                |                                    |                                    |                                                         |                                        |                          |                                   | ?                                |                                          |                                        |                                |                                                        | ?             |
| Norway 2 2009                 |                                    |                                    |                                                         |                                        |                          |                                   | ?                                |                                          |                                        |                                |                                                        |               |
| Norway 3, 2011                |                                    |                                    |                                                         |                                        |                          | ?                                 | ?                                |                                          |                                        |                                |                                                        | ?             |
| Norway 4, 2013                |                                    |                                    |                                                         |                                        |                          | ?                                 | ?                                |                                          |                                        |                                |                                                        |               |
| Norway 5, 2013                |                                    |                                    |                                                         |                                        |                          | ?                                 | ?                                |                                          |                                        |                                |                                                        | ?             |
| Norway 6, 2015                |                                    |                                    | ?                                                       |                                        |                          | ?                                 | ?                                |                                          |                                        |                                |                                                        |               |
| Norway 7, 2015                |                                    |                                    |                                                         |                                        |                          | ?                                 | ?                                |                                          |                                        |                                |                                                        | ?             |
| Russia 1, 2011                |                                    |                                    |                                                         |                                        |                          |                                   | ?                                |                                          |                                        |                                |                                                        | ?             |
| Russia 2, 2012                |                                    |                                    | ?                                                       |                                        |                          | ?                                 | ?                                |                                          |                                        |                                |                                                        | ?             |
| Russia 3, 2013                |                                    |                                    |                                                         |                                        |                          | ?                                 | ?                                |                                          |                                        |                                |                                                        | ?             |
| South Africa 1, 2015          |                                    |                                    |                                                         |                                        |                          | ?                                 | ?                                |                                          |                                        |                                |                                                        | ?             |
| South Korea 1, 2011           |                                    |                                    | ?                                                       |                                        |                          | ?                                 | ?                                |                                          |                                        |                                |                                                        | ?             |



## Supplementary material

| Study identifier    | Target population clearly defined? | Source population clearly defined? | Source population adequate sample of target population? | Similar responders and non-responders? | Probability sample used? | Sample size calculation reported? | Calculated sample size achieved? | Can we be confident in the assessment of | Data provided to calculate prevalence? | Confidence intervals reported? | Data provided on number of people asked to participate | Response rate |
|---------------------|------------------------------------|------------------------------------|---------------------------------------------------------|----------------------------------------|--------------------------|-----------------------------------|----------------------------------|------------------------------------------|----------------------------------------|--------------------------------|--------------------------------------------------------|---------------|
| South Korea 2 ,2013 |                                    |                                    |                                                         |                                        |                          | ?                                 | ?                                |                                          |                                        |                                |                                                        | ?             |
| South Korea 3, 2014 |                                    |                                    |                                                         |                                        |                          | ?                                 | ?                                |                                          |                                        |                                |                                                        | ?             |
| Sweden 1, 2003      |                                    |                                    | ?                                                       |                                        |                          | ?                                 | ?                                |                                          |                                        |                                |                                                        | ?             |
| Sweden 2, 2004      |                                    |                                    |                                                         |                                        |                          | ?                                 | ?                                |                                          |                                        |                                |                                                        |               |
| Sweden 3, 2004      |                                    |                                    | ?                                                       |                                        |                          | ?                                 | ?                                |                                          |                                        |                                |                                                        | ?             |
| Sweden 4, 2005      |                                    |                                    |                                                         |                                        |                          | ?                                 | ?                                |                                          |                                        |                                |                                                        | ?             |
| Sweden 5, 2005      |                                    |                                    | ?                                                       |                                        |                          | ?                                 | ?                                |                                          |                                        |                                |                                                        | ?             |
| Sweden 6, 2005      |                                    |                                    | ?                                                       |                                        |                          | ?                                 | ?                                |                                          |                                        |                                |                                                        |               |
| Sweden 7, 2007      |                                    |                                    | ?                                                       |                                        |                          | ?                                 | ?                                |                                          |                                        |                                |                                                        | ?             |
| Sweden 8, 2008      |                                    |                                    |                                                         |                                        |                          | ?                                 | ?                                |                                          |                                        |                                |                                                        |               |
| Sweden 9, 2012      |                                    |                                    |                                                         |                                        |                          |                                   | ?                                |                                          |                                        |                                |                                                        |               |
| Tanzania 1, 2006    |                                    |                                    |                                                         |                                        |                          |                                   |                                  |                                          |                                        |                                |                                                        |               |
| Uganda 1, 2012      |                                    |                                    |                                                         |                                        |                          |                                   |                                  |                                          |                                        |                                |                                                        |               |
| Uganda 2, 2014      |                                    |                                    |                                                         |                                        |                          | ?                                 | ?                                |                                          |                                        |                                |                                                        | ?             |
| USA 1, 2003         |                                    |                                    | ?                                                       |                                        |                          | ?                                 | ?                                |                                          |                                        |                                |                                                        | ?             |
| USA 2, 2007         |                                    |                                    |                                                         |                                        |                          | ?                                 | ?                                |                                          |                                        |                                |                                                        | ?             |
| USA 3, 2008         |                                    |                                    |                                                         |                                        |                          | ?                                 | ?                                |                                          |                                        |                                |                                                        | ?             |
| USA 4, 2010         |                                    |                                    | ?                                                       |                                        |                          | ?                                 | ?                                |                                          |                                        |                                |                                                        | ?             |
| USA 5, 2014         |                                    |                                    |                                                         |                                        |                          | ?                                 | ?                                |                                          |                                        |                                |                                                        |               |
| Venezuela 1, 2013   |                                    |                                    | ?                                                       |                                        |                          | ?                                 | ?                                |                                          |                                        |                                |                                                        | ?             |
| Vietnam 1, 2009     |                                    |                                    |                                                         |                                        |                          | ?                                 | ?                                |                                          |                                        |                                |                                                        | ?             |

? Insufficient information to assess item

|                                       |
|---------------------------------------|
| Population based, random sampling     |
| Population based, non-random sampling |

## Supplementary material

Figure S3. Forest plot of studies of *M. genitalium* prevalence, by age and sex in general population samples

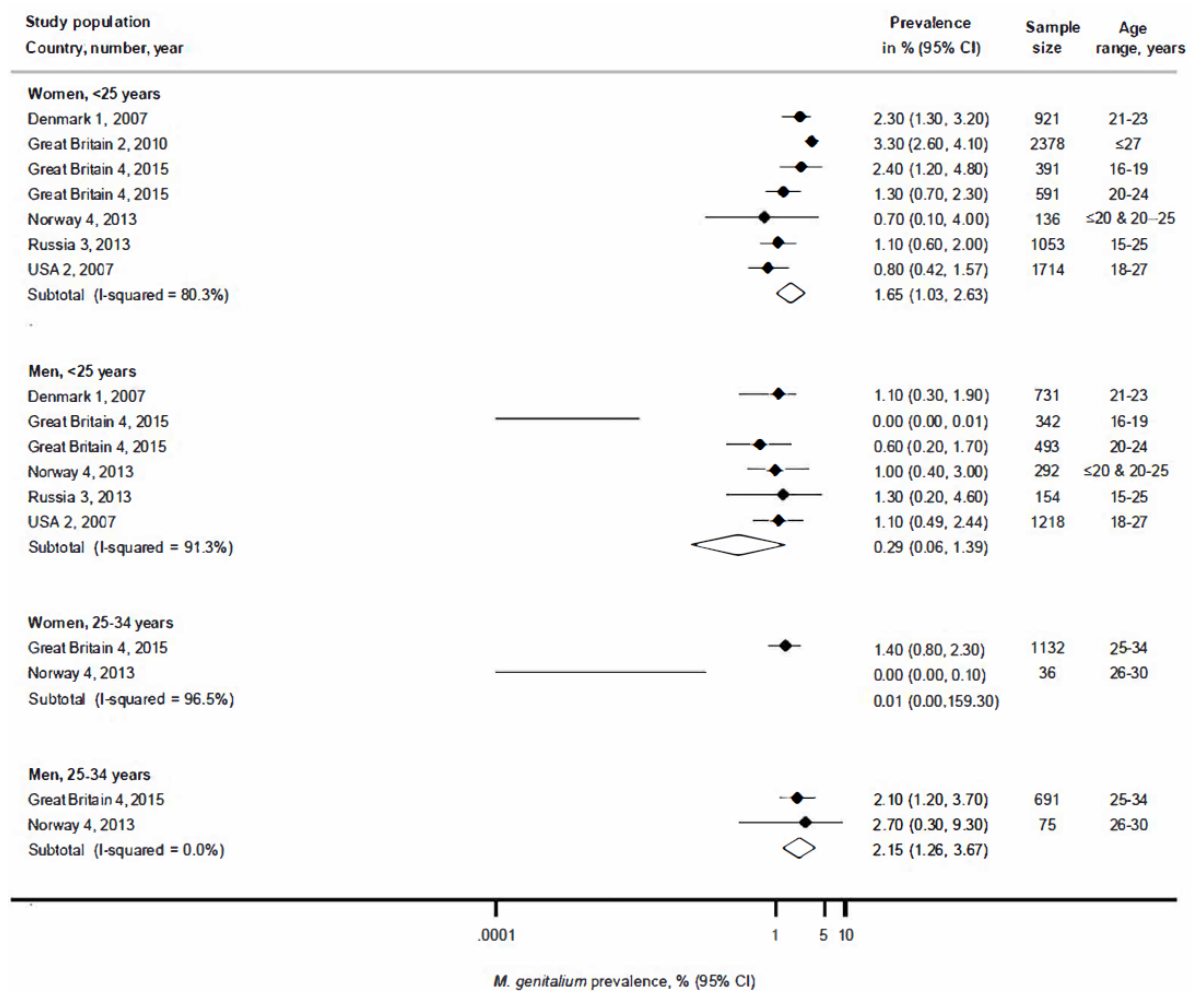

## Supplementary material

Figure S4. Forest plot of studies of *M. genitalium* prevalence in healthcare clinic based settings, by symptom status of patients and enrolment process

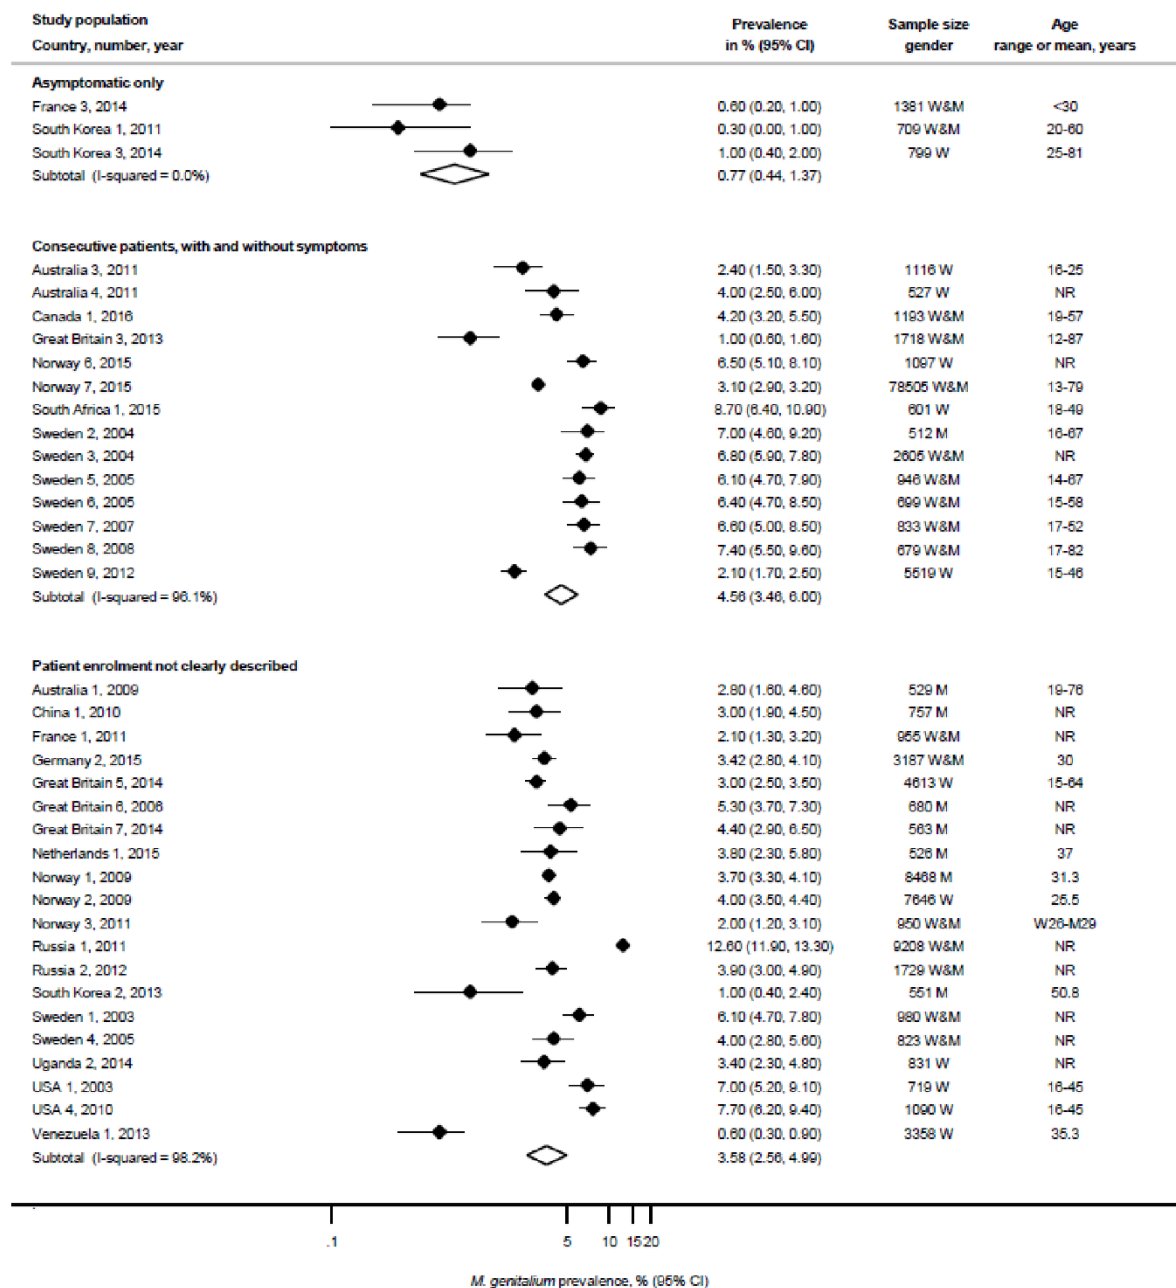

Supplement: inline-supplementary-material-1 [file inline-supplementary-material-1.pdf]
